# Supplementary material
Source: HighWire-hosted journal article supplement (https://www.haematologica.org/content/suppl/2018/02/09/haematol.2017.175729)
Supplement: HAEMATOL-2017-175729v4-Mustjoki-01.pdf [file HAEMATOL-2017-175729v4-Mustjoki-01.pdf]

# Felty syndrome and large granular lymphocyte leukemia share many clinical features and analogous pathogenic molecular markers, including somatic *STAT3* mutations

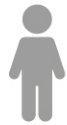

14

Felty syndrome patients

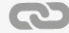

Identification of common molecular pathogenesis between Felty syndrome and LGL leukemia

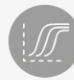

PCR-based next generation sequencing

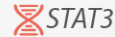

*STAT3*

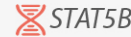

*STAT5B*

- *STAT3* mutation
- Most common *STAT3* mutations
- *STAT5B* mutation
- LGL lymphocytosis in blood smears
- T-cell clone sizes
- VAFs
- Plasma cytokines

## Felty syndrome

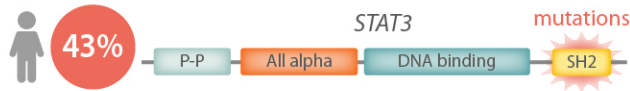

Y640F, D661

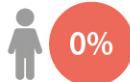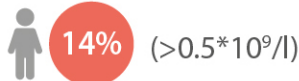

small

low

10/92 cytokines  
high: IL-15RA\*, CXCL10\*, PD-L1

## LGL leukemia

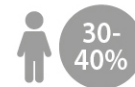

Y640F, D661

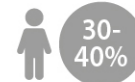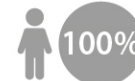

big

high

10/92 cytokines  
high: IL-15RA\*, CXCL10\*, IL-8, CCL4
